# Supplementary material for: ONX-0914 Induces Apoptosis and Autophagy with p53 Regulation in Human Glioblastoma Cells
Source: MDPI journal article supplement (doi:10.3390/cancers14225712), 2022-11-21
Supplement: s1 [file s1]

# Supplementary Materials: ONX-0914 induces apoptosis and autophagy via p53 induction in human glioblastoma cells

Hsin-Han Chang, Yi-Hsuan Lin, Tzu-Min Chen, Yu-Ling Tsai, Chien-Rui Lai, Wen-Chiuan Tsai, Yu-Chen Cheng and Ying Chen

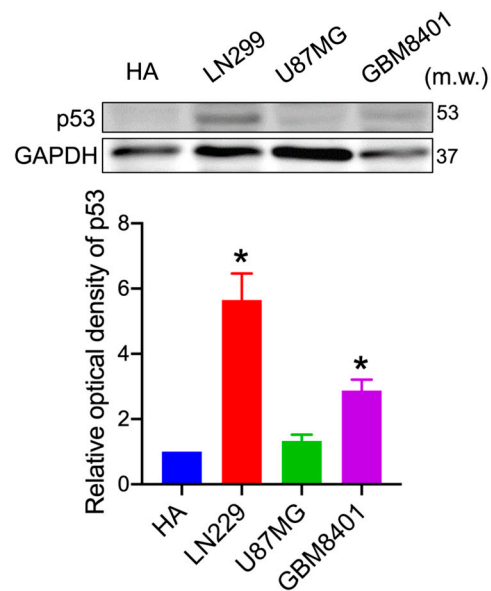

**Figure S1.** The p53 protein expression in human glioblastoma cells. HA: cell lysate of human astrocytes. \*  $p < 0.05$  compared to HA group.  $n = 3$ .

**Table S1.** The information of antibody.

| Name         | Species | Brand      | Cat      |
|--------------|---------|------------|----------|
| GAPDH        | Rb      | CST        | 5174S    |
| PSMB8        | Rb      | CST        | 13635S   |
| BCL-2        | Rb      | CST        | 4223S    |
| PARP         | Rb      | CST        | 9532S    |
| p-p53        | Rb      | CST        | 9284S    |
| p53          | Rb      | CST        | 9282S    |
| p62          | MS      | Santa Cruz | SC-28359 |
| LC3B         | Rb      | CST        | 3868S    |
| p-AKT (T308) | Rb      | CST        | 13038S   |
| AKT          | Rb      | CST        | 4691S    |
| p-mTOR       | Rb      | CST        | 5536S    |
| mTOR         | Rb      | CST        | 2972S    |
